# Supplementary material
Source: MDPI journal article supplement (https://www.mdpi.com/2308-3417/8/5/100)
Supplement: s1 [file s1]

**Supplemental Table S1.** Numbers of medication by class prescribed to hospitalised Calgary seniors 2013-2021.

| Medication Class        | Count   |
|-------------------------|---------|
| Statin                  | 2706992 |
| PPI                     | 2477437 |
| Calciumblocker          | 2343022 |
| Betablocker             | 2120849 |
| Appropriatebetablocker* | 1866600 |
| Aceinhibitor            | 1786653 |
| Antiplatelet            | 1724720 |
| NSAID                   | 1661178 |
| Thyroxine               | 1537833 |
| ARB                     | 1363172 |
| Aspirin                 | 1317398 |
| Opioid                  | 1263059 |
| Acetaminophen           | 1194105 |
| SSRI                    | 1076966 |
| Loopdiuretic            | 996801  |
| Metformin               | 962475  |
| Antidepressantmore      | 915163  |
| Hypnotic                | 791259  |
| A1blocker               | 727397  |
| Anticholmusc            | 692128  |
| Corticost systemic      | 678234  |
| Neuroleptic             | 677408  |
| Vitkantagonist          | 661224  |
| Beta2agonist            | 582813  |
| Laxative                | 574443  |
| SNRI                    | 563657  |
| Hypocalcaemia           | 562393  |
| Benzodiazepine          | 529618  |
| Bisphosphonate          | 522139  |

**Supplemental Table S2.** First admission. Gender, age, comorbidities, numbers of medications, PIMs, PPOs, Charlson Index and correlations with readmission or mortality within 6 months of discharge (data for 129443 admissions).

| Risk factor                                                                    | Readmission within 6 months |           |       | Mortality within 6 months |           |       |
|--------------------------------------------------------------------------------|-----------------------------|-----------|-------|---------------------------|-----------|-------|
|                                                                                | Unadjusted ORs and 95% CIs  |           |       |                           |           |       |
|                                                                                | OR                          | 95%CI     | p     | OR                        | 95%CI     | p     |
| Gender                                                                         | 1.17                        | 1.14-1.20 | <.001 | 1.07                      | 1.03-1.11 | <.001 |
| Age at admission                                                               | 1.01                        | 1.01-1.02 | <.001 | 1.07                      | 1.07-1.07 | <.001 |
| Number of comorbidities                                                        | 1.06                        | 1.05-1.06 | <.001 | 1.21                      | 1.20-1.21 | <.001 |
| Post admission Rx number                                                       | 1.13                        | 1.12-1.13 | <.001 | 1.07                      | 1.06-1.07 | <.001 |
| Total STOPP PIMs                                                               | 1.17                        | 1.16-1.17 | <.001 | 1.04                      | 1.03-1.05 | <.001 |
| START Omissions (PPOs) not corrected                                           | 1.51                        | 1.47-1.55 | <.001 | 2.47                      | 2.57-2.56 | <.001 |
| START Omissions (PPOs) correctly prescribed                                    | 1.43                        | 1.39-1.47 | <.001 | 1.03                      | 0.99-1.07 | .109  |
| AGS Beers PIMs                                                                 | 1.12                        | 1.11-1.12 | <.001 | 1.11                      | 1.11-1.12 | <.001 |
| Charlson Index                                                                 | 1.12                        | 1.12-1.13 | <.001 | 1.46                      | 1.45-1.47 | <.001 |
| ORs and 95% CIs adjusted for age at admission, gender (male) and comorbidities |                             |           |       |                           |           |       |
|                                                                                | OR                          | 95%CI     | p     | OR                        | 95%CI     | p     |
| Post admission Rx number                                                       | 1.12                        | 1.12-1.12 | <.001 | 1.04                      | 1.04-1.05 | <.001 |
| Total STOPP PIMs                                                               | 1.16                        | 1.15-1.16 | <.001 | 0.99                      | 0.96-1.00 | <.001 |

|                                 |      |           |       |      |           |       |
|---------------------------------|------|-----------|-------|------|-----------|-------|
| START PPOs not prescribed       | 1.39 | 1.35-1.42 | <.001 | 1.56 | 1.50-1.63 | <.001 |
| START PPOS correctly prescribed | 1.26 | 1.23-1.30 | <.001 | 0.51 | 0.49-0.53 | <.001 |
| AGS Beers                       | 1.11 | 1.11-1.11 | <.001 | 1.08 | 1.07-1.08 | <.001 |

**Supplemental Table S3.** Second admission. Numbers of medications, PIMs, PPOs, and correlations with readmission or mortality within 6 months of discharge (data for 64441 admissions).

| Risk factor                                                                    | Readmission within 6 months |           |       | Mortality within 6 months |           |       |
|--------------------------------------------------------------------------------|-----------------------------|-----------|-------|---------------------------|-----------|-------|
| ORs and 95%CI's adjusted for age at admission, gender (male) and comorbidities |                             |           |       |                           |           |       |
|                                                                                | OR                          | 95%CI     | p     | OR                        | 95%CI     | p     |
| Post admission Rx number                                                       | 1.11                        | 1.11-1.12 | <.001 | 1.01                      | 1.1-1.02  | <.001 |
| Total STOPP PIMs                                                               | 1.15                        | 1.14-1.15 | <.001 | 0.98                      | 0.98-0.99 | <.001 |
| START PPOs not corrected                                                       | 1.41                        | 1.36-1.46 | <.001 | 1.44                      | 1.37-1.51 | <.001 |
| START PPOS correctly prescribed                                                | 1.36                        | 1.31-1.41 | <.001 | 0.52                      | 0.50-0.55 | <.001 |
| AGS Beers                                                                      | 1.10                        | 1.10-1.11 | <.001 | 1.07                      | 1.06-1.07 | <.001 |

**Supplemental Table S4.** Third admission. Numbers of medications, PIMs, PPOs, and correlations with readmission or mortality within 6 months of discharge (data for 35206 admissions).

| Risk factor                                                                    | Readmission within 6 months |           |       | Mortality within 6 months |           |       |
|--------------------------------------------------------------------------------|-----------------------------|-----------|-------|---------------------------|-----------|-------|
| ORs and 95%CI's adjusted for age at admission, gender (male) and comorbidities |                             |           |       |                           |           |       |
| Post admission Rx number                                                       | 1.10                        | 1.09-1.10 | <.001 | 1.00                      | 0.99-1.01 | <.667 |
| Total STOPP PIMs                                                               | 1.14                        | 1.13-1.15 | <.001 | 0.98                      | 0.97-1.00 | <.004 |
| START PPOs not corrected                                                       | 1.41                        | 1.35-1.48 | <.001 | 1.33                      | 1.25-1.41 | <.001 |
| START PPOS correctly prescribed                                                | 1.42                        | 1.36-1.49 | <.001 | 1.04                      | 1.04-1.04 | <.001 |
| AGS Beers                                                                      | 1.09                        | 1.08-1.10 | <.001 | 1.06                      | 1.05-1.06 | <.001 |

**Supplemental Table S5.** Fourth admission. Numbers of medications, PIMs, PPOs, Charlson Index and correlations with readmission or mortality within 6 months of discharge (data for 20354 admissions).

| Risk factor                                                                    | Readmission within 6 months |            |       | Mortality within 6 months |           |       |
|--------------------------------------------------------------------------------|-----------------------------|------------|-------|---------------------------|-----------|-------|
| ORs and 95%CI's adjusted for age at admission, gender (male) and comorbidities |                             |            |       |                           |           |       |
|                                                                                | OR                          | 95%CI      | p     | OR                        | 95%CI     | p     |
| Post admission Rx number                                                       | 1.10                        | 1.09-1.10  | <.001 | 0.98                      | 0.98-0.99 | <.001 |
| Total STOPP PIMs                                                               | 1.15                        | 1.14-1.17  | <.001 | 0.96                      | 0.95-0.98 | <.001 |
| START PPOs not corrected                                                       | 1.35                        | 1.28-1.44  | <.001 | 1.30                      | 1.21-1.40 | <.001 |
| START PPOS correctly prescribed                                                | 1.50                        | 1.41-1.59  | <.001 | 0.56                      | 0.52-0.61 | <.001 |
| AGS Beers                                                                      | 1.09                        | 1.08-1.101 | <.001 | 1.04                      | 1.03-1.05 | <.001 |

**Supplemental Table S6.** Fifth admission. Number of medications, PIMs, PPOs, Charlson Index and correlations with readmission or mortality within 6 months of discharge (data for 12271 admissions).

| Risk factor                                                                    | Readmission within 6 months |           |       | Mortality within 6 months |           |       |
|--------------------------------------------------------------------------------|-----------------------------|-----------|-------|---------------------------|-----------|-------|
| ORs and 95%CI's adjusted for age at admission, gender (male) and comorbidities |                             |           |       |                           |           |       |
|                                                                                | OR                          | 95%CI     | p     | OR                        | 95%CI     | p     |
| Post admission Rx number                                                       | 1.08                        | 1.07-1.09 | <.001 | 0.97                      | 0.96-0.98 | <.001 |
| Total STOPP PIMs                                                               | 1.13                        | 1.12-1.15 | <.001 | 0.97                      | 0.95-0.98 | <.001 |
| START PPOs not corrected                                                       | 1.38                        | 1.28-1.49 | <.001 | 1.23                      | 1.12-1.34 | <.001 |
| START PPOS correctly prescribed                                                | 1.49                        | 1.38-1.60 | <.001 | 0.63                      | 0.57-0.68 | <.001 |
| AGS Beers                                                                      | 1.07                        | 1.06-1.09 | <.001 | 1.03                      | 1.03-1.04 | <.001 |

**Supplemental Table S7.** Sixth admission. Numbers of medications, PIMs, PPOs, Charlson Index and correlations with readmission or mortality within 6 months of discharge (data for 7577 admissions).

| Risk factor                                                                    | Readmission within 6 months |           |        | Mortality within 6 months |           |       |
|--------------------------------------------------------------------------------|-----------------------------|-----------|--------|---------------------------|-----------|-------|
| ORs and 95%CI's adjusted for age at admission, gender (male) and comorbidities |                             |           |        |                           |           |       |
|                                                                                | OR                          | 95%CI     | p      | OR                        | 95%CI     | p     |
| Post admission Rx number                                                       | 1.08                        | 1.07-1.09 | <.001  | 0.95                      | 0.94-0.96 | <.001 |
| Total STOPP PIMs                                                               | 1.14                        | 1.12-1.16 | <.001  | 0.97                      | 0.95-0.99 | <.001 |
| START PPOs not corrected                                                       | 1.47                        | 1.34-1.62 | <.001  | 1.24                      | 1.11-1.40 | <.001 |
| START PPOS correctly prescribed                                                | 1.64                        | 1.49-1.81 | <.001  | 0.68                      | 0.61-0.76 | <.001 |
| AGS Beers                                                                      | 1.08                        | 1.07-1.09 | 1<.001 | 1.02                      | 1.01-1.04 | <.001 |

**Supplemental Table S8.** Seventh through 39<sup>th</sup> admissions. Numbers of medications, PIMs, PPOs, Charlson Index and correlations with readmission or mortality within 6 months of discharge (data for 10994 admissions).

| Risk factor                                                                   | Readmission within 6 months |           |       | Mortality within 6 months |           |       |
|-------------------------------------------------------------------------------|-----------------------------|-----------|-------|---------------------------|-----------|-------|
| ORs and 95%CIs adjusted for age at admission, gender (male) and comorbidities |                             |           |       |                           |           |       |
|                                                                               | OR                          | 95%CI     | p     | OR                        | 95%CI     | p     |
| Post admission Rx number                                                      | 1.06                        | 1.06-1.07 | <.001 | 0.95                      | 0.94-0.96 | <.001 |
| Total STOPP PIMs                                                              | 1.13                        | 1.12-1.15 | <.001 | 0.94                      | 0.93-0.96 | <.001 |
| START PPOs not corrected                                                      | 1.23                        | 1.14-1.34 | <.001 | 1.14                      | 1.04-1.26 | <.001 |
| START PPOS correctly prescribed                                               | 1.53                        | 1.41-1.65 | <.001 | 0.71                      | 0.65-0.78 | <.001 |
| AGS Beers                                                                     | 1.07                        | 1.06-1.08 | <.001 | 1.00                      | 0.99-1.01 | <.892 |

**Supplemental Table S9.** Population of Calgary ages 65 to 100+, Canadian Census 2022.

| Population of Calgary 2022 Canadian Census |        |       |        |                           |      |        |
|--------------------------------------------|--------|-------|--------|---------------------------|------|--------|
| Age                                        | Counts |       |        | Rates in total population |      |        |
|                                            | Total  | Male  | Female | Total                     | Male | Female |
| 65-69                                      | 62120  | 30410 | 31710  | 4.8                       | 4.7  | 4.8    |
| 70-74                                      | 46495  | 22225 | 24270  | 3.6                       | 3.4  | 3.7    |
| 75-79                                      | 28965  | 13485 | 15485  | 2.2                       | 2.1  | 2.4    |
| 80-84                                      | 19405  | 8370  | 11035  | 1.5                       | 1.3  | 1.7    |
| 85-89                                      | 12620  | 4995  | 7625   | 1.0                       | 0.8  | 1.2    |
| 90-94                                      | 6225   | 2115  | 4110   | 0.5                       | 0.3  | 0.6    |
| 96-99                                      | 1375   | 390   | 990    | 0.1                       | 0.1  | 0.2    |
| ≥100                                       | 195    | 45    | 155    | 0.0                       | 0.0  | 0.0    |
| Total                                      | 177405 | 82035 | 95375  | 13.6                      | 12.6 | 14.5   |

Source: <https://www12.statcan.gc.ca/census-recensement/2021/dp-pd/prof/index.cfm?Lang=E>.
